# Supplementary material for: Vaccine-induced human monoclonal antibodies to PfRH5 show broadly neutralizing activity against P. falciparum clinical isolates
Source: PubMed Central journal article supplement — NPJ Vaccines. 2024 Oct 24;9:198. doi: 10.1038/s41541-024-00986-x (PMC11502735; doi:10.1038/s41541-024-00986-x), 2024-10-24
Supplement: 41541_2024_986_MOESM1_ESM.pdf [file 41541_2024_986_MOESM1_ESM.pdf]

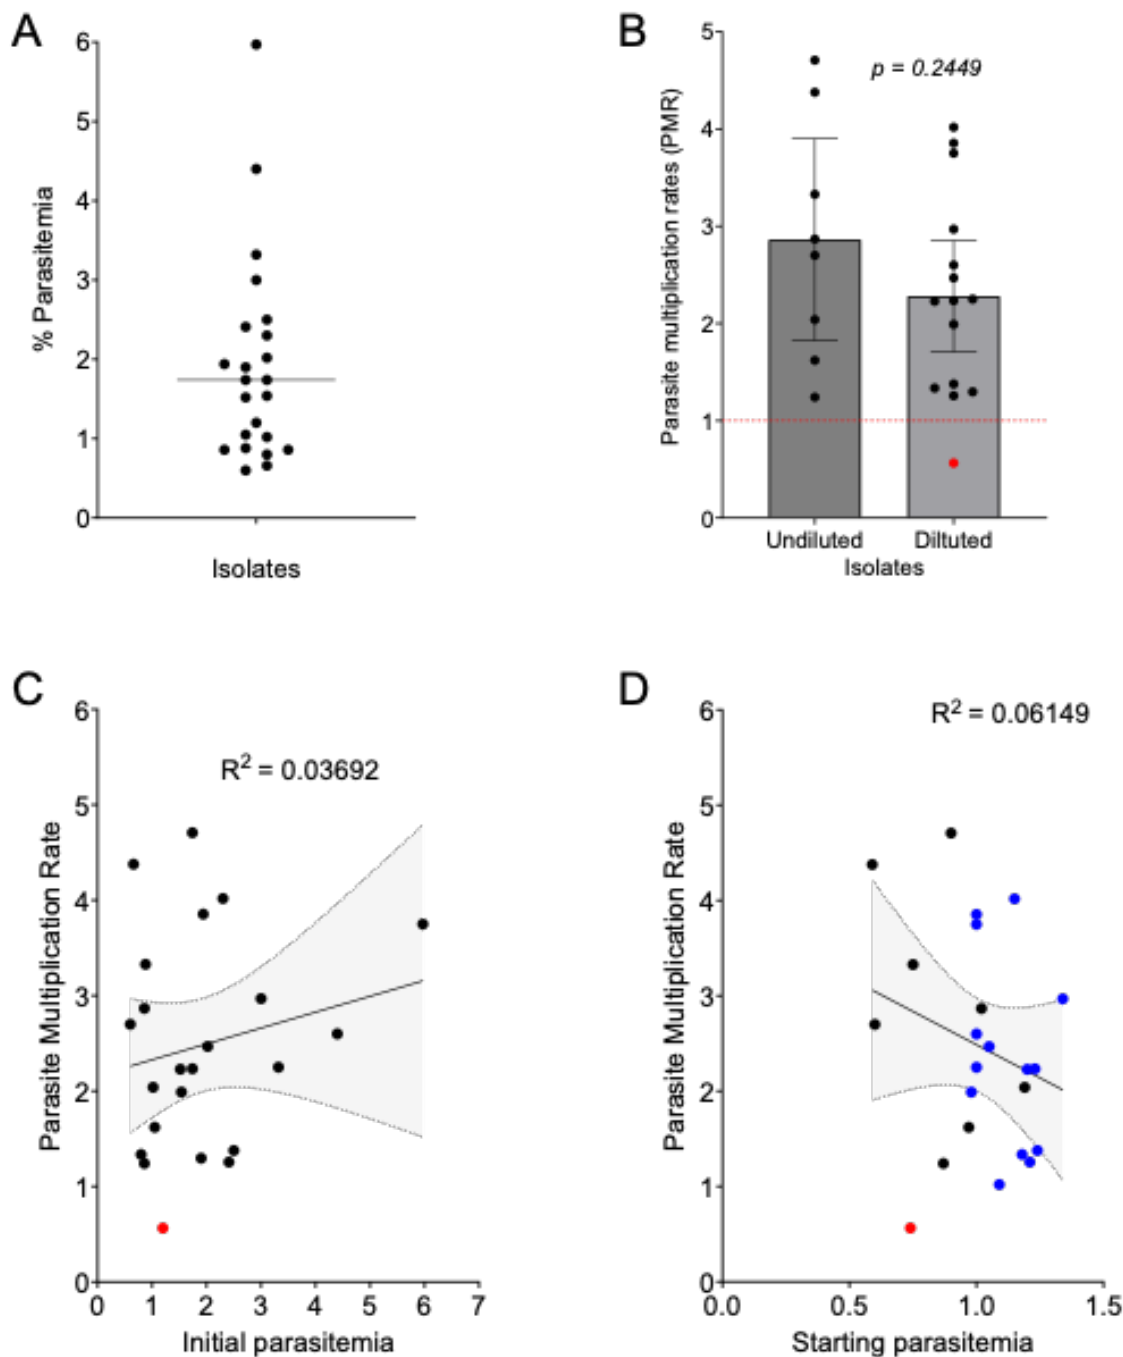

**Supplementary Figure 1:** Relationship between the clinical isolates parasitemia and the parasite multiplication rates (PMR) in the positive control wells (RMPI only). (A) Initial parasitemia of *P. falciparum* clinical isolates. (B) PMR of *P. falciparum* clinical isolates used in GIA assays (N = 23). The PMR is defined as the ratio of the final parasitemia by that of the initial parasitemia in the control RPMI wells and assays were only considered successful and included in the final analysis if PRM was greater than 1. (C-D) Relationships between the clinical isolates initial parasitemia / GIA starting parasitemia and the PMR computed using the simple linear regression analysis and the goodness of fit ( $R^2$ ) in GraphPad prism 10.2.3. Blue dots in (D) represent isolates for which the assays were diluted with fresh O+ erythrocytes from a single donor.

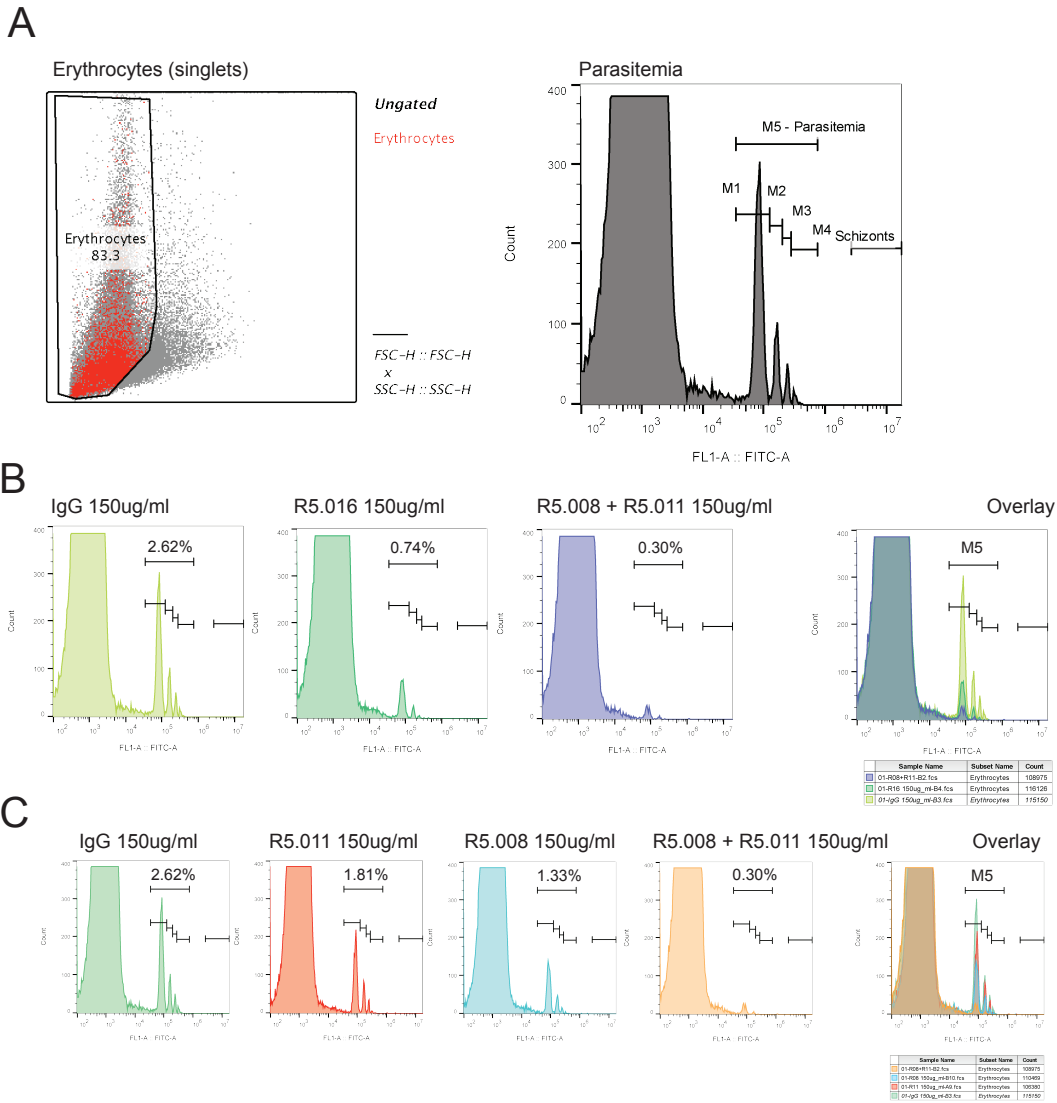

**Supplementary Figure 2. Gating strategy and examples of data generated by SYBR Green Flow Cytometry.** A. Gating strategy. Total number of events recorded and the total number of erythrocytes gated in the forward scatter (FSC) by side scatter (SSC) dot plot. Erythrocyte singlets are gated as “Erythrocytes”. Histogram plot showing the erythrocyte counts (y axis) and the fluorescence intensity of SYBR Green, FL1 (FITC) positive infected erythrocytes (x axis). Parasitemia is quantified as percentage of infected erythrocytes relative to the total erythrocytes. Infected erythrocytes are gated as M1-M5, with M1 representing singly infected, M2 representing doubly, M3 representing triply, M4 representing quadruple infected erythrocytes, and M5 representing total parasitemia. Any residual schizonts are not included in the re-invasion parasitemia. C-D. Example parasitemia data generated in the histogram view for growth inhibition activities by IgG and potent single mAb treatments (R5.016) compared to combination (R5.008 + R5.011), and (C) treatment with individual and mAb combinations (D).

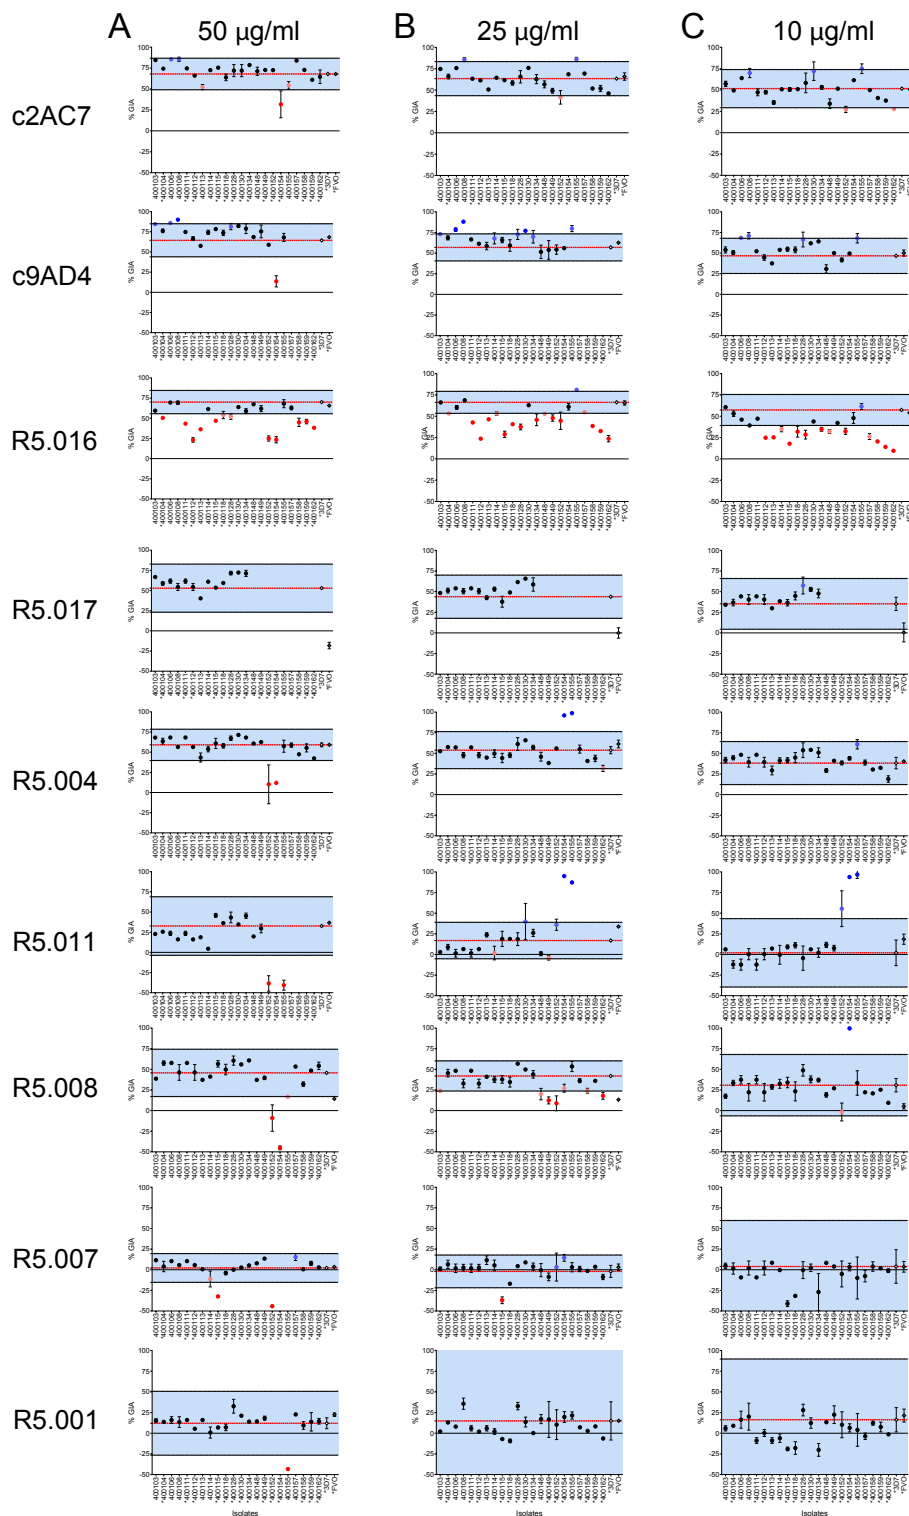

**Supplementary Figure 3: Variation of percent GIA ranges and immune susceptibility profiles of *P. falciparum* clinical isolates to PfRH5-vaccine-induced mAbs.** Dot plots of %GIA to anti-PfRH5 mAbs (Y-axis) of *P. falciparum* clinical isolates (X-axis) at different concentrations (50 µg/ml (A), 25 µg/ml (B) or 10 µg/ml (C)). The %GIA susceptibility ranges are defined as 3D7 mean %GIA (red dotted lines)  $\pm$  3SD 3D7 %GIA (black dotted lines). Black dots represent isolates lying within the defined susceptibility ranges. Red dots represent isolates reflecting a reduced GIA susceptibility phenotype (bright red) or laying at the borderline (dim red) of the lower limit of the defined susceptibility threshold. Blue dots represent isolates showing an increased GIA susceptibility (bright blue) or laying at the borderline (dim blue) of the upper limit of the defined susceptibility threshold. Isolates where parasitemia was diluted with O+ blood from a single donor are indicated with a star (\*).

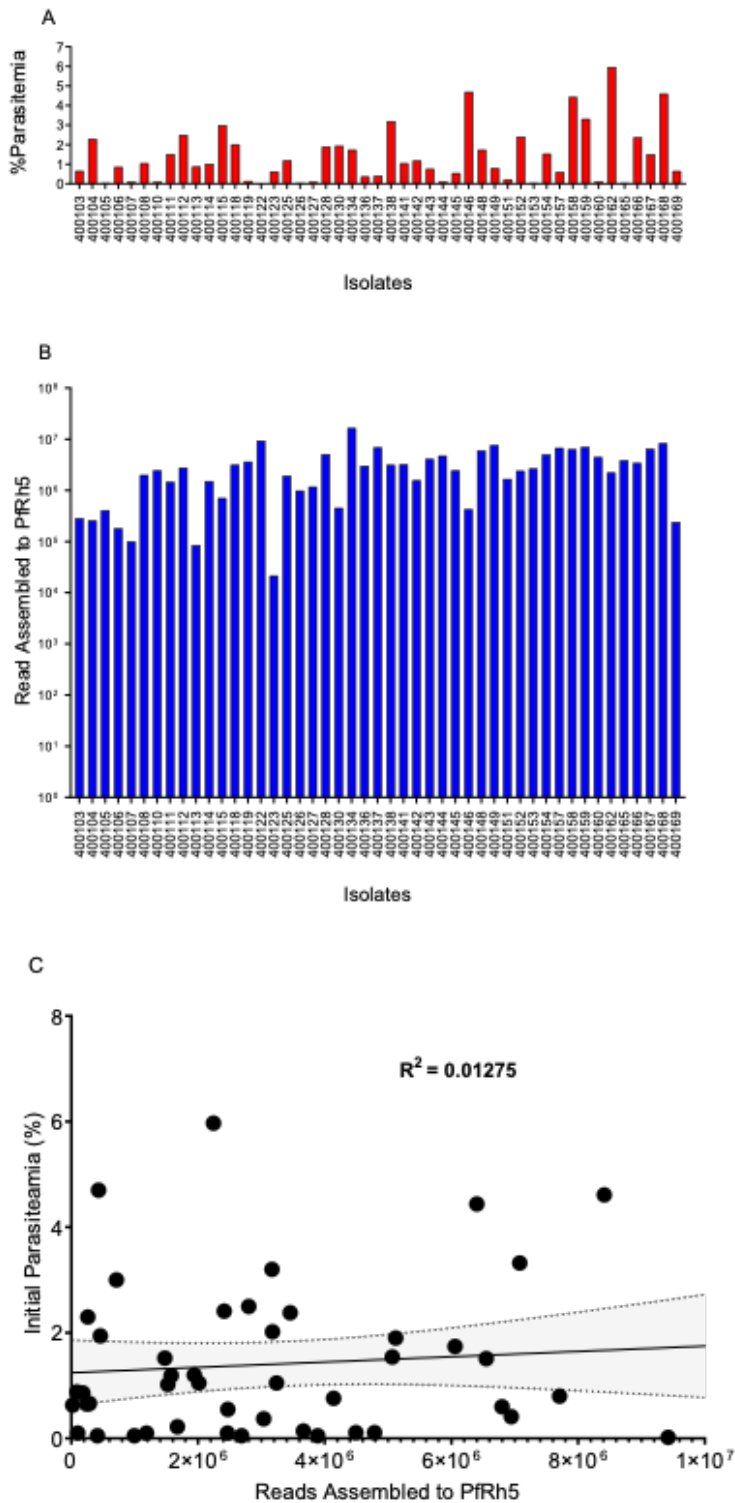

**Supplementary Figure 4:** Relationship between the clinical samples' initial parasitemia and the number of sequencing reads assembled to the Pfrh5 reference sequence. (A) Percent parasitemia of *P. falciparum* clinical isolates (N = 50) defined as the percentage of infected erythrocytes over the total number of counted erythrocytes using a thin blood smear. (B) Total number of sequencing reads assembled to the *pfrh5* reference sequence. The Pfrh5 sequencing was performed using the Novaseq 6000 sequencing platform and het data were analyzed using the Geneious Prime software version 23.1.1. and the graphs plotted using GraphPad Prism version 10.2.3. (C) Relationship between initial parasitemia and number of sequencing reads assembled to Pfrh5 computed using the simple linear regression analysis and the goodness of fit ( $R^2$ ) in GraphPad prism 10.2.3.

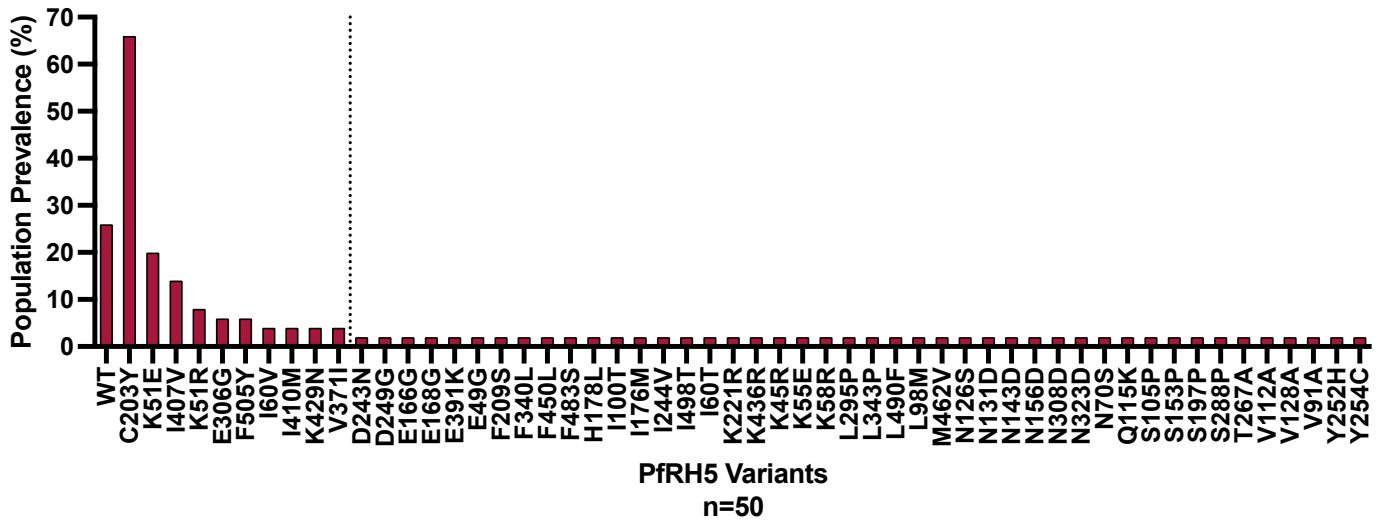

**Supplementary Figure 5: PfrH5-associated genetic diversity in *P. falciparum* clinical isolates from Kédougou (N = 50).** The prevalence of PfrH5-associated SNPs was calculated as the percentage of SNPs detected within the total sample population (N= 50). PfrH5 sequencing was performed from *pfprh5* amplicons using the Illumina NovaSeq 6000 sequencing platform and variant analysis was performed using the Geneious Prime software version 23.1.1. The graphs were plotted using the GraphPad Prism version 1.0.2 software. SNPs are ordered by prevalence, with higher prevalence SNPs to the left and rare SNPs to the left. SNPs displayed to the left of the dotted line represent SNPs present in a single sample (and at a prevalence of 2%). “WT” represents the *pfprh5* 3D7 reference allele.

| mAb      | Concentration    | Isolate | Genotype            | p-value      |         |
|----------|------------------|---------|---------------------|--------------|---------|
| c2AC7    | 50               | 400106  | C203Y               | 0.034        |         |
|          |                  | 400162  | C203Y               | 0.048        |         |
| c9AD4    | 50               | 400128  | C203Y; E306G        | 0.046        |         |
|          | 25               | 400108  | WT                  | 0.038        |         |
|          |                  | 400130  | WT                  | 0.024        |         |
| 10       | 400113           | D243N   | 0.004               |              |         |
| R5.016   | 50               | 400111  | K51E; K51R; C203Y   | 0.011        |         |
|          |                  | 400112  | K51E; C203Y         | 0.026        |         |
|          |                  | 400113  | D243N               | 0.047        |         |
|          |                  | 400152  | C203Y               | 0.039        |         |
|          | 25               | 400162  | C203Y               | 0.012        |         |
|          |                  | 400112  | K51E; C203Y         | 0.005        |         |
|          |                  | 400113  | D243N               | 0.027        |         |
|          |                  | 400118  | K51E; C203Y         | 0.015        |         |
|          | 10               | 400158  | C203Y; V371I        | 0.027        |         |
|          |                  | 400159  | K51E; K51R; I60V    | 0.017        |         |
|          |                  | 400106  | C203Y               | 0.022        |         |
|          |                  | 400108  | WT                  | 0.009        |         |
|          |                  | 400112  | K51E; C203Y         | 0.017        |         |
|          |                  | 400113  | D243N               | 0.004        |         |
|          |                  | 400115  | WT                  | 0.0007       |         |
|          |                  | 400149  | C203Y; I407V; F505Y | 0.037        |         |
|          |                  | 400158  | C203Y; V371I        | 0.002        |         |
| 400159   | K51E; K51R; I60V | 0.027   |                     |              |         |
| 400162   | C203Y            | 0.042   |                     |              |         |
| R5.004   | 50               | 400154  | C203Y               | 0.013        |         |
| R5.017** | 150              | 400113  | D243N               | <0.0001      |         |
|          |                  | 400130  | WT                  | 0.005        |         |
|          |                  | FVO     | S197Y               | <0.0001      |         |
|          | 50               | 400103  | D249G; Y254C        | 0.02         |         |
|          |                  | 400113  | D243N               | 0.03         |         |
|          |                  | 400128  | C203Y; E306G        | 0.0006       |         |
|          |                  | 400130  | WT                  | 0.0003       |         |
|          |                  | 400134  | WT                  | 0.0008       |         |
|          |                  | FVO     | S197Y               | <0.0001      |         |
|          | 25               | 400128  | C203Y; E306G        | 0.001        |         |
|          |                  | 400130  | WT                  | <0.0001      |         |
|          |                  | 400134  | WT                  | 0.01         |         |
|          |                  | FVO     | S197Y               | <0.0001      |         |
|          |                  | 10      | 400128              | C203Y; E306G | <0.0001 |
|          |                  |         | 400130              | WT           | 0.001   |
| 400134   | WT               |         | 0.042               |              |         |
| FVO      | S197Y            | <0.0001 |                     |              |         |
| R5.008   | 150              | 400114  | C203Y               | 0.024        |         |
|          |                  | 400155  | WT                  | 0.036        |         |
|          |                  | 400158  | C203Y; V371I        | 0.024        |         |
|          |                  | 400162  | C203Y               | 0.012        |         |
|          | 50               | 400154  | C203Y               | 0.002        |         |
|          |                  | FVO     | S197Y               | 0.025        |         |
|          | 25               | 400128  | C203Y; E306G        | 0.038        |         |
|          |                  | 400128  | C203Y; E306G        | 0.007        |         |
| R5.011   | 50               | 400108  | WT                  | 0.049        |         |
|          |                  | 400112  | K51E; C203Y         | 0.049        |         |
|          |                  | 400154  | C203Y               | 0.002        |         |
|          | 25               | 400103  | D249G; Y254C        | 0.029        |         |
| 400154   |                  | C203Y   | 0.001               |              |         |
| 400155   | WT               | 0.014   |                     |              |         |
| R5.007   | 50               | 400103  | D249G; Y254C        | 0.002        |         |
|          |                  | 400115  | WT                  | 0.008        |         |
|          |                  | 400152  | C203Y               | 0.034        |         |
| R5.001   | 150              | 400103  | D249G; Y254C        | 0.03         |         |
|          |                  | 400108  | WT                  | 0.033        |         |
|          |                  | 400155  | WT                  | 0.041        |         |
|          |                  | FVO     | S197Y               | 0.046        |         |
|          | 50               | 400154  | C203Y               | 0.026        |         |
|          |                  | 400115  | WT                  | 0.024        |         |
| 10       | 400162           | C203Y   | 0.033               |              |         |

**Supplementary Table 1: Statistic table showing clinical isolates with a significant difference of %GIA relative to the 3D7 reference clone.** P-values were computed using the Dunnett's multiple comparison test following the Two-way ANOVA analysis and parasite genotypes were obtained using the Illumina NovaSeq 6000 next-generation sequencing platform.

| PDB ID | Complex        | Mutation | ddG (kcal/mol) | Rh5 stability (kcal/mol) |
|--------|----------------|----------|----------------|--------------------------|
| 4U0Q   | RH5/Basigin    | Y203C    | 2.4296         | 0.753                    |
| 4U0Q   | RH5/Basigin    | E306G    | 0              | 1.8518                   |
| 4U0Q   | RH5/Basigin    | F505Y    | 0              | 0.1749                   |
| 4U0Q   | RH5/Basigin    | I407V    | 0              | 1.1062                   |
| 4U0Q   | RH5/Basigin    | K221R    | 0              | -0.2696                  |
| 4U0Q   | RH5/Basigin    | V371I    | 0              | -0.124                   |
| 4U0R   | RH5/9AD4       | Y203C    | -0.0134        | 0.8367                   |
| 4U0R   | RH5/9AD4       | E306G    | 0              | 1.3719                   |
| 4U0R   | RH5/9AD4       | F505Y    | 0              | -0.0289                  |
| 4U0R   | RH5/9AD4       | I407V    | 0              | 1.3516                   |
| 4U0R   | RH5/9AD4       | K221R    | 0              | 0.6477                   |
| 4U0R   | RH5/9AD4       | V371I    | 0              | -0.5554                  |
| 4U1G   | RH5/QA1        | Y203C    | 0              | 0.868                    |
| 4U1G   | RH5/QA1        | E306G    | 0              | 1.2399                   |
| 4U1G   | RH5/QA1        | F505Y    | 0              | -0.018                   |
| 4U1G   | RH5/QA1        | I407V    | 0              | 0.7001                   |
| 4U1G   | RH5/QA1        | K221R    | 0              | 1.9648                   |
| 4U1G   | RH5/QA1        | V371I    | 0              | -0.646                   |
| 6MPV   | Rh5/CyPRA/Ripr | C203Y    | 0              | -0.298                   |
| 6MPV   | Rh5/CyPRA/Ripr | E306G    | 0              | 1.144                    |
| 6MPV   | Rh5/CyPRA/Ripr | F505Y    | 1.3743         | -0.424                   |
| 6MPV   | Rh5/CyPRA/Ripr | I407V    | 0              | 0.801                    |
| 6MPV   | Rh5/CyPRA/Ripr | K221R    | 0              | -0.384                   |
| 6MPV   | Rh5/CyPRA/Ripr | V371I    | 0              | 0.482                    |
| 6RCU   | Rh5/R5.004     | C203Y    | 0              | -0.84124                 |
| 6RCU   | Rh5/R5.004     | E306G    | 0              | 2.09274                  |
| 6RCU   | Rh5/R5.004     | F505Y    | 0              | 0.06114                  |
| 6RCU   | Rh5/R5.004     | I407V    | 0              | 0.89026                  |
| 6RCU   | Rh5/R5.004     | K221R    | 0              | 0.03218                  |
| 6RCU   | Rh5/R5.004     | V371I    | 0              | 0.7566                   |
| 6RCV   | Rh5/R5.011     | C203Y    | 0              | 1.811                    |
| 6RCV   | Rh5/R5.011     | E306G    | -0.0436        | 1.1167                   |
| 6RCV   | Rh5/R5.011     | I407V    | 0              | 0.7807                   |
| 6RCV   | Rh5/R5.011     | K221R    | -0.027         | -1.006                   |
| 6RCV   | Rh5/R5.011     | V371I    | 0              | 1.4678                   |
| 7PHU   | Rh5/R5.015     | Y203C    | 0              | 0.8163                   |
| 7PHU   | Rh5/R5.015     | E306G    | 0              | 2.763                    |
| 7PHU   | Rh5/R5.015     | F505Y    | 0.5901         | -0.5333                  |
| 7PHU   | Rh5/R5.015     | I407V    | 0              | 1.4872                   |
| 7PHU   | Rh5/R5.015     | K221R    | 0              | 0.2871                   |
| 7PHU   | Rh5/R5.015     | V371I    | 0              | 0.4805                   |
| 6RCU   | Rh5/R5.016     | C203Y    | -0.099         | -1.0154                  |
| 6RCU   | Rh5/R5.016     | E306G    | 0              | 1.7303                   |
| 6RCU   | Rh5/R5.016     | F505Y    | 0              | 0.0265                   |
| 6RCU   | Rh5/R5.016     | I407V    | 0              | 0.8954                   |
| 6RCU   | Rh5/R5.016     | K221R    | -0.0415        | 0.0724                   |
| 6RCU   | Rh5/R5.016     | V371I    | 0              | 0.7306                   |

### Supplementary Table 2. Predicted binding energy changes for BSG and RH5 variant proteins:

Individual FASTA files with PfRH5 and individual SNP were threaded through the crystal structure and the impact of the mutant versions of the protein was evaluated for predicted binding affinity of PfRH5 to its binding partner PfCyRPA, its erythrocyte receptor, Basigin, or the test human mAbs. The structural effect of the PfRH5-associated SNPs was evaluated for predicted binding affinity between the mutant version of the RH5 protein and, binding partner PfCyRPA, the Basigin receptor or test mAbs. The binding energy alternation for SNPs and BSG were predicted by FoldX version 5.0. Predicted binding energies are shown for reference and mutant alleles of the protein in Kcal/mol for each SNP. Changes between the two are shown as ddG (Kcal/mol). A negative ddG indicates a predicted increase in binding and a positive ddG indicates a predicted decrease in binding.
